# Supplementary material for: Impact of Competition Versus Centralisation of Hospital Care on Process Quality: A Multilevel Analysis of Breast Cancer Surgery in France
Source: PubMed Central journal article supplement (PMC9309946; doi:10.34172/ijhpm.2020.179), 2020-09-30
Supplement: ijhpm-11-459-s001.pdf [file ijhpm-11-459-s001.pdf]

**Supplementary file 1**

**Table S1. Patient Level Variables**

| <b>All Patients (Breast Cancer Surgery)</b> |                                   |             |                                        |             |      |
|---------------------------------------------|-----------------------------------|-------------|----------------------------------------|-------------|------|
|                                             |                                   | <b>2005</b> |                                        | <b>2012</b> |      |
| Percent admitted to closest hospital        |                                   |             |                                        |             |      |
| <i>from low- income area</i>                |                                   | 14.2        |                                        | 20.5        |      |
| <i>from middle income area</i>              |                                   | 14.8        |                                        | 21.4        |      |
| <i>high_income area</i>                     |                                   | 13.7        |                                        | 16.9        |      |
| Distance to chosen hospital (km)            |                                   |             |                                        |             |      |
|                                             |                                   | 33.4km      |                                        | 31.9km      |      |
|                                             |                                   | (62.1 km)   |                                        | (57.4 km)   |      |
|                                             | <b>Sentinel lymph node biopsy</b> |             | <b>Immediate breast reconstruction</b> |             |      |
|                                             |                                   | 2005        | 2012                                   | 2005        | 2012 |
| Age (%)                                     |                                   |             |                                        |             |      |
| <= 50                                       | 26.3                              | 25.3        | 26.4                                   | 27.2        |      |
| 50 - 60                                     | 27.1                              | 23.6        | 24.3                                   | 20.6        |      |
| 60 - 70                                     | 22.9                              | 26.7        | 20.1                                   | 22.3        |      |
| > 70                                        | 23.8                              | 24.4        | 29.2                                   | 29.9        |      |
| Charlson index (%)                          |                                   |             |                                        |             |      |
| 0                                           | 78.0                              | 74.8        | 72.8                                   | 67.5        |      |
| 1                                           | 5.8                               | 5.7         | 5.9                                    | 6.2         |      |
| 2 or more                                   | 16.2                              | 19.5        | 21.4                                   | 26.3        |      |
| Carcinoma in situ                           |                                   |             |                                        |             |      |
| 0                                           | 92.1                              | 91.7        | 91.7                                   | 92.2        |      |
| 1                                           | 7.9                               | 8.3         | 8.3                                    | 7.8         |      |
| Total mastectomy                            |                                   |             |                                        |             |      |
| 0                                           | 72.3                              | 72.9        |                                        |             |      |
| 1                                           | 27.7                              | 27.1        |                                        |             |      |
| Total mastectomy + axillary dissection      |                                   |             |                                        |             |      |
| 0                                           |                                   |             | 35.1                                   | 34.2        |      |
| 1                                           |                                   |             | 64.9                                   | 65.8        |      |
| Chemotherapy in the year                    |                                   |             |                                        |             |      |
| 0                                           |                                   |             | 60.5                                   | 55.2        |      |
| 1                                           |                                   |             | 39.5                                   | 44.8        |      |
| Residence area income                       |                                   |             |                                        |             |      |
| low                                         | 33.5                              | 33.6        | 34.1                                   | 34.1        |      |
| medium                                      | 33.0                              | 32.6        | 33.5                                   | 32.7        |      |
| high                                        | 33.4                              | 33.9        | 32.4                                   | 33.3        |      |

**Table S2. Sensitivity Analysis: HHI as a Linear Index\***

|                                            | IBR         |             | SLNB        |             |
|--------------------------------------------|-------------|-------------|-------------|-------------|
|                                            | model 1     | model 3     | model 1     | model 3     |
| <b>Hospital characteristics</b>            |             |             |             |             |
| <b>Volume of activity</b>                  |             |             |             |             |
| <= 21                                      | <i>Réf.</i> | <i>Réf.</i> | <i>Réf.</i> | <i>Réf.</i> |
| 21-49                                      | 0.25        | 0.25        | 0.96***     | 0.71***     |
| 49-110                                     | 0.52**      | 0.52**      | 0.74***     | 0.95***     |
| > 110                                      | 0.80***     | 0.78***     | 1.35***     | 1.30***     |
| <b>Hospital profile</b>                    |             |             |             |             |
| CHR                                        | 0.21        | 0.24        | 1.11***     | 1.17***     |
| CH                                         | -0.74***    | -0.72***    | 0.20        | 0.22        |
| CLCC                                       | 0.39        | 0.43        | 2.06***     | 2.09***     |
| PNL                                        | 0.04        | 0.25        | 0.72***     | 0.79***     |
| PL                                         | <i>Réf.</i> | <i>Réf.</i> | <i>Réf.</i> | <i>Réf.</i> |
| <b>Years</b>                               |             |             |             |             |
| 2005                                       | <i>Réf.</i> | <i>Réf.</i> | <i>Réf.</i> | <i>Réf.</i> |
| 2012                                       | 0.35***     | 0.82***     | 1.74***     | 2.17***     |
| <b>ln(1/hhi)</b>                           |             |             |             |             |
| ln(1/hhi)                                  | 0.27***     | 0.55**      | -0.32***    | 0.37**      |
| ln(1/hhi) <sup>2</sup>                     |             | -0.04       |             | -0.23***    |
| ln(1/hhi)*2012                             |             | -0.36***    |             | -0.37***    |
| <b>Residual (inter-hospital variation)</b> | 1.26        | 1.28        | 1.94        | 1.97        |
| <b>MOR</b>                                 | 2.92        | 2.94        | 3.78        | 3.82        |
| <b>Deviance</b>                            | 224,765     | 225,153     | 595,210     | 595,734     |

\*Controlling for patient characteristics. HHI index is inversed (negative natural logarithm of the HHI) so that higher the HHI higher, the level of competition in the market.

Significance: \*: 10%; \*\*: 5%; \*\*\*: 1%.

IBR: Immediate breast reconstruction; SLNB: Sentinel lymph node biopsy.

**Table S3.** Test of Competition Measures<sup>1</sup>

|                           | <b>IBR</b>  |              |             |              | <b>SLNB</b> |              |              |              |
|---------------------------|-------------|--------------|-------------|--------------|-------------|--------------|--------------|--------------|
|                           | <b>1</b>    | <b>2</b>     | <b>1</b>    | <b>2</b>     | <b>1</b>    | <b>2</b>     | <b>1</b>     | <b>2</b>     |
| <b>Année</b>              |             |              |             |              |             |              |              |              |
| 2005                      | <i>Réf.</i> | <i>Réf.</i>  | <i>Réf.</i> | <i>Réf.</i>  | <i>Réf.</i> | <i>Réf.</i>  | <i>Réf.</i>  | <i>Réf.</i>  |
| 2012                      | 0.38***     | 1.14***      | 0.38***     | 1.03***      | 1.83***     | 2.58***      | 1.82***      | 2.56***      |
| <b>HHI all cancers</b>    |             |              |             |              |             |              |              |              |
| high (<=1250)             | 0.61***     | 1.16***      |             |              |             |              |              |              |
| medium (1250-2990)        | 0.39***     | 0.98***      |             |              |             |              |              |              |
| low (>2990)               | <i>Réf.</i> | <i>Réf.</i>  |             |              |             |              |              |              |
| high (<=1250) *2012       |             | -<br>0.91*** |             |              |             |              |              |              |
| medium (1250-2990)*2012   |             | -<br>0.88*** |             |              |             |              |              |              |
| low (>2990) *2012         |             | <i>Réf.</i>  |             |              |             |              |              |              |
| <b>Hospital count (N)</b> |             |              |             |              |             |              |              |              |
| high (>8)                 |             |              | 0.71***     | 1.18***      |             |              |              |              |
| medium (3-8)              |             |              | 0.14        | 0.70***      |             |              |              |              |
| low (<=3)                 |             |              | <i>Réf.</i> | <i>Réf.</i>  |             |              |              |              |
| High (>8) *2012           |             |              |             | -<br>0.76*** |             |              |              |              |
| medium (3-8)*2012         |             |              |             | -<br>0.81*** |             |              |              |              |
| low (<3) *2012            |             |              |             | <i>Réf.</i>  |             |              |              |              |
| <b>HHI all cancer</b>     |             |              |             |              |             |              |              |              |
| high (<=1250)             |             |              |             |              | 0.31***     | 0.89***      |              |              |
| medium (1250-2990)        |             |              |             |              | -0.10       | 0.58***      |              |              |
| low (>2990)               |             |              |             |              | <i>Réf.</i> | <i>Réf.</i>  |              |              |
| high (<=1250) *2012       |             |              |             |              |             | -<br>1.01*** |              |              |
| medium (1250-2990)*2012   |             |              |             |              |             | 0.99***      |              |              |
| low (>2990) *2012         |             |              |             |              |             | <i>Réf.</i>  |              |              |
| <b>Hospital count (N)</b> |             |              |             |              |             |              |              |              |
| high (>8)                 |             |              |             |              |             |              | -<br>0.88*** | -<br>0.34*** |
| medium (3-8)              |             |              |             |              |             |              | 0.17**       | 0.89***      |
| low (<3)                  |             |              |             |              |             |              | <i>Réf.</i>  | <i>Réf.</i>  |
| High (>8) *2012           |             |              |             |              |             |              |              | -<br>1.05*** |

|                                              |         |         |         |         |         |         |         |         |              |
|----------------------------------------------|---------|---------|---------|---------|---------|---------|---------|---------|--------------|
| medium (3-8)*2012                            |         |         |         |         |         |         |         |         | -<br>0.98*** |
| low (<3) *2012                               |         |         |         |         |         |         |         |         | Réf.         |
| <b>Résidu (variance inter-établissement)</b> | 1.24    | 1.27    | 1.26    | 1.26    | 2.40    | 2.49    | 2.45    | 2.60    |              |
| <b>MOR</b>                                   | 2.89    | 2.94    | 2.92    | 2.91    | 4.39    | 4.51    | 4.45    | 4.65    |              |
| <b>Déviance</b>                              | 223,857 | 225,209 | 223,780 | 224,503 | 594,390 | 600,474 | 594,542 | 600,270 |              |

1) Random effect models controlling for all patient characteristics.

**Table S4. Correlation Between Different Competition and Quality Measures**

| Spearman correlation coefficients  |                       |                     |                   |                   |                   |                       |                     |                   |                   |                   |
|------------------------------------|-----------------------|---------------------|-------------------|-------------------|-------------------|-----------------------|---------------------|-------------------|-------------------|-------------------|
| 2005 (N=803)                       |                       |                     |                   |                   |                   | 2012 (N=526)          |                     |                   |                   |                   |
|                                    | Breast_cancer_hhi_100 | All_cancers_hhi_100 | Hospital count    | IBR               | SLNB              | Breast_cancer_hhi_100 | All_cancers_hhi_100 | Hospital count    | IBR               | SLNB              |
| Breast_cancer_hhi_100 <sup>1</sup> | 1                     | 0.9133<br><.0001    | -0.9426<br><.0001 | -0.3146<br><.0001 | -0.2026<br><.0001 | 1                     | 0.8765<br><.0001    | -0.9542<br><.0001 | -0.3942<br><.0001 | -0.2458<br><.0001 |
| All_cancers_hhi_100 <sup>2</sup>   | 0.9133<br><.0001      | 1.0000              | -0.9687<br><.0001 | -0.3442<br><.0001 | -0.2302<br><.0001 | 0.8765<br><.0001      | 1.0000              | -0.9323<br><.0001 | -0.4429<br><.0001 | -0.3036<br><.0001 |
| Hospital count <sup>3</sup>        | -0.9426<br><.0001     | -0.9687<br><.0001   | 1.0000            | 0.3406<br><.0001  | 0.2149<br><.0001  | -0.9542<br><.0001     | -0.9323<br><.0001   | 1.0000            | 0.4300<br><.0001  | 0.2563<br><.0001  |
| IBR <sup>4</sup>                   | -0.3146<br><.0001     | -0.3442<br><.0001   | 0.3406<br><.0001  | 1.0000            | 0.4734<br><.0001  | -0.3942<br><.0001     | -0.4429<br><.0001   | 0.4300<br><.0001  | 1.0000            | 0.6488<br><.0001  |
| SLNB <sup>4</sup>                  | -0.2026<br><.0001     | -0.2302<br><.0001   | 0.2149<br><.0001  | 0.4734<br><.0001  | 1.0000            | -0.2458<br><.0001     | -0.3036<br><.0001   | 0.2563<br><.0001  | 0.6488<br><.0001  | 1.0000            |

1) Herfindahl index (base 100) on breast cancer surgery admissions only

2) Herfindahl index (base 100) on all cancers surgery admissions

3) Number of hospitals providing breast cancer surgery within the catchment area

4) Number of patients offered IBR or SLNB
